# Supplementary material
Source: publisher figshare collection journal article supplement (https://frontiersin.figshare.com/ndownloader/files/28620762)
Supplement: Supplementary file 1 [file 28620762]

## Supplementary Material

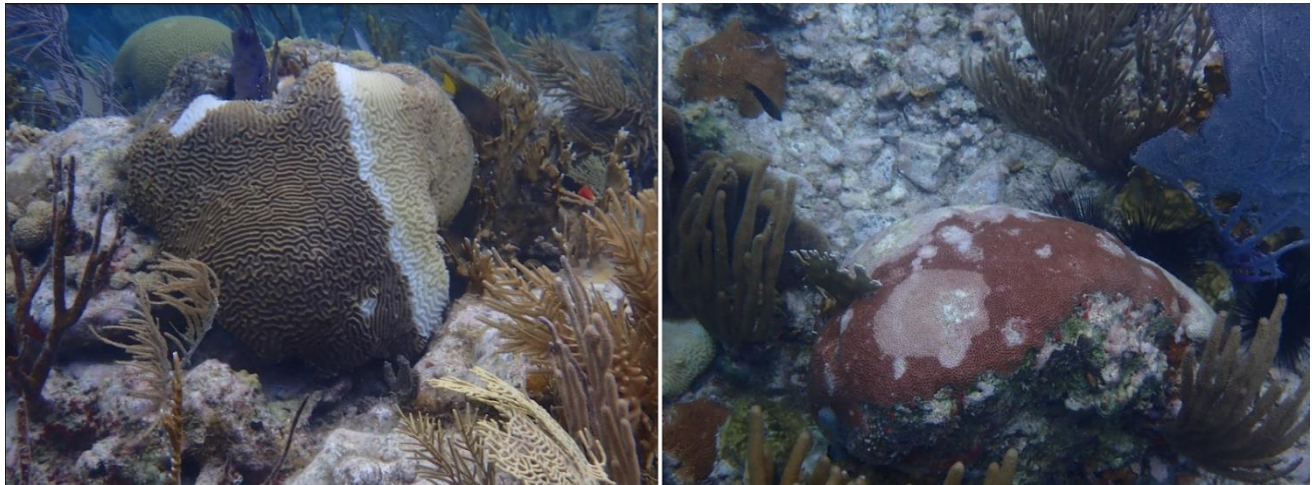

**Supplementary Figure 1. Examples of corals with disease documented as “present” (showing signs consistent with SCTLD) at Vessup Point (site #5164) on March 1, 2020. *Pseudodiploria strigosa* (left) and *Siderastrea siderea* (right) exhibiting multiple lesions and rapid tissue loss (Photos by Kayla Budd).**

**Supplementary Table 1. Sample size and confidence of susceptibility classification.** In this study susceptibility is either unknown (data deficient), low (<20% disease prevalence), intermediate (20–40% disease prevalence), or high (>40% disease prevalence) in St. Thomas. Confidence levels in susceptibility rankings determined through this study are based on sample size and disease prevalence.

| Species                               | Sample Size (N) (Epidemic Zone) | Confidence |
|---------------------------------------|---------------------------------|------------|
| <i>Acropora cervicornis</i><br>A CERV | 0                               | N/A        |
| <i>Acropora palmata</i><br>A PALM     | 0                               | N/A        |
| <i>Agaricia agaricites</i><br>A AGAR  | 39                              | High       |
| <i>Agaricia fragilis</i>              | 1                               | Low        |

|                                            |   |      |
|--------------------------------------------|---|------|
| A FRAG                                     |   |      |
| <i>Agaricia grahame</i><br>A GRAH          | 0 | N/A  |
| <i>Agaricia humilis</i><br>A HUMI          | 9 | Low  |
| <i>Agaricia lamarcki</i><br>A LAMA         | 2 | Low  |
| <i>Agaricia species</i><br>A SPE           | 4 |      |
| <i>Agaricia tenuifolia</i><br>A TENU       | 0 | N/A  |
| <i>Colpophyllia natans</i><br>C NATA       | 7 | High |
| <i>Dendrogyra cylindrus</i><br>D CYLI      | 2 | High |
| <i>Dichocoenia stokesii</i><br>D STOK      | 7 | Low  |
| <i>Diploria labyrinthiformis</i><br>D LABY | 2 | Low  |
| <i>Eusmilia fastigiata</i><br>E FAST       | 8 | Low  |
| <i>Favia fragum</i><br>F FRAG              | 0 | N/A  |
| <i>Helioseris cucullata</i>                | 0 | N/A  |

|                                              |    |      |
|----------------------------------------------|----|------|
| H CUCU                                       |    |      |
| <i>Isophyllastrea rigida</i><br>I RIGI       | 0  | N/A  |
| <i>Isophyllastrea sinuosa</i><br>I SINU      | 0  | N/A  |
| <i>Madracis aureterna</i><br>M AURE          | 0  | N/A  |
| <i>Madracis decactis</i><br>M DECA           | 0  | N/A  |
| <i>Madracis formosa</i><br>M FORM            | 0  | N/A  |
| <i>Manicina areolata</i><br>M AREO           | 0  | N/A  |
| <i>Meandrina jacksoni</i><br>M JACK          | 0  | N/A  |
| <i>Meandrina meandrites</i><br>M MEAN        | 5  | N/A  |
| <i>Montastrea cavernosa</i><br>M CAVE        | 17 | High |
| <i>Mycetophyllia aliciae</i><br>M ALIC       | 0  | N/A  |
| <i>Mycetophyllia ferox</i><br>M FERO         | 1  | Low  |
| <i>Orbicella annularis</i> complex<br>O ANCX | 1  |      |

|                                            |     |      |
|--------------------------------------------|-----|------|
| <i>Orbicella annularis</i><br>O ANNU       | 11  | High |
| <i>Orbicella faveolata</i><br>O FAVE       | 50  | High |
| <i>Orbicella franksi</i><br>O FRAN         | 10  | Low  |
| <i>Porites astreoides</i><br>P ASTR        | 144 | High |
| <i>Porites colonensis</i><br>P COLO        | 0   | N/A  |
| <i>Porites porites</i><br>P PORI           | 62  | High |
| <i>Pseudodiploria clivosa</i><br>P CLIV    | 0   | N/A  |
| <i>Pseudodiploria strigosa</i><br>P STRI   | 9   | Low  |
| <i>Siderastrea radians</i><br>S RAD I      | 32  | High |
| <i>Siderastrea siderea</i><br>S SIDE       | 150 | High |
| <i>Solenastrea bournoni</i><br>S BOUR      | 0   | N/A  |
| <i>Stephanocoenia intersepta</i><br>S INTE | 21  | High |

**Supplementary Table 2. Friedman rank test for rapid tissue loss prevalence on coral reefs in the endemic and epidemic zones.**

|                              | F- Statistic | P-value |
|------------------------------|--------------|---------|
| <b>Zone</b>                  | 5.00         | 0.03*   |
| <b>Species Richness</b>      | 1.27         | 0.27    |
| <b>Zone:Species Richness</b> | 1.70         | 0.20    |

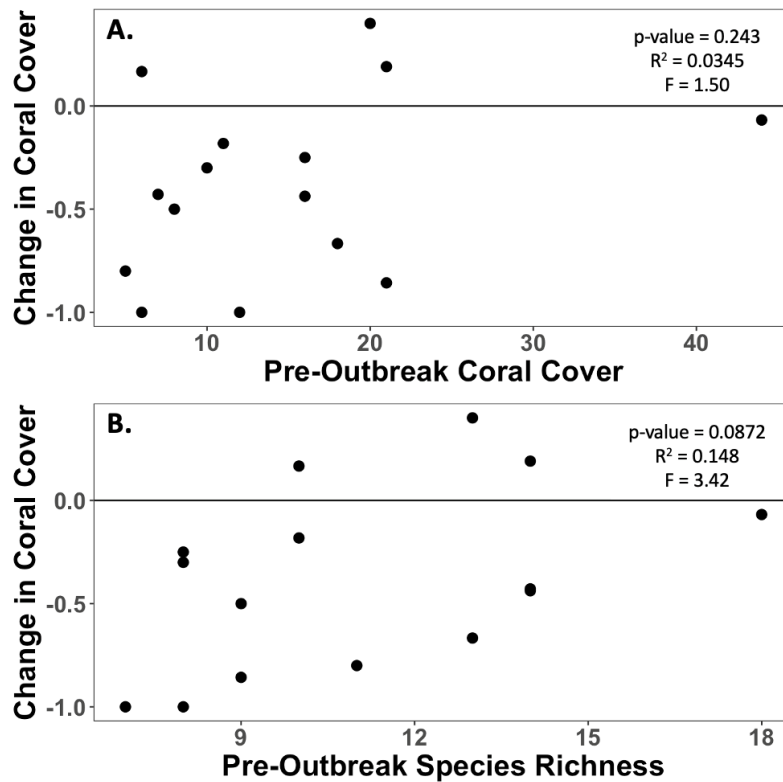

**Supplementary Figure 2. Relationships between proportional change in coral cover and pre-outbreak (A) coral cover and (B) species richness on coral reefs in the endemic zone.**

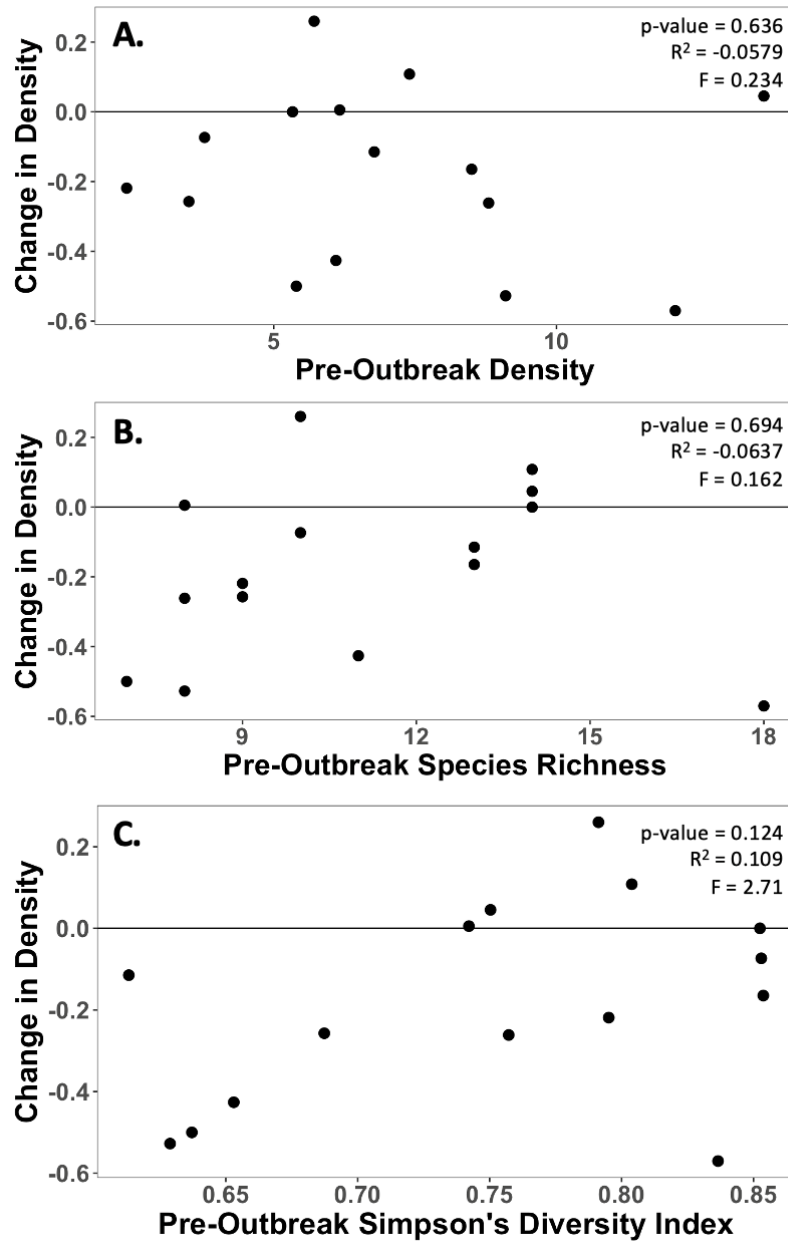

**Supplementary Figure 3. Relationships between the proportional change in coral density and pre-outbreak (A) coral density, (B) species richness, and (C) Simpson's Diversity Index on coral reefs in the endemic zone.**

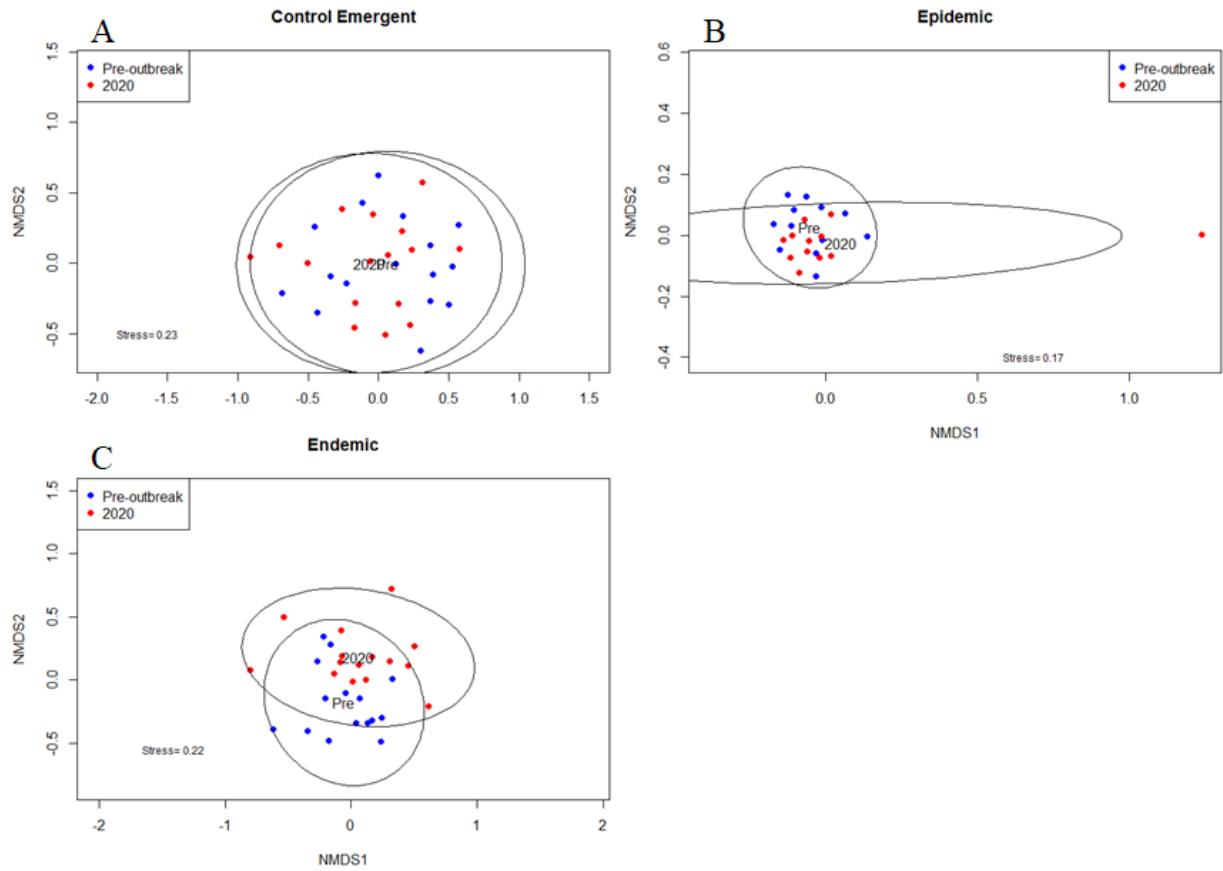

**Supplemental Figure 4. Non-metric multidimensional scaling (nMDS) analyses of community structure comparing pre-outbreak with 2020 in (A) control and emergent zone (B) epidemic zone, and (C) endemic zone. Centroids are labeled with text (“Pre” and “2020”).**

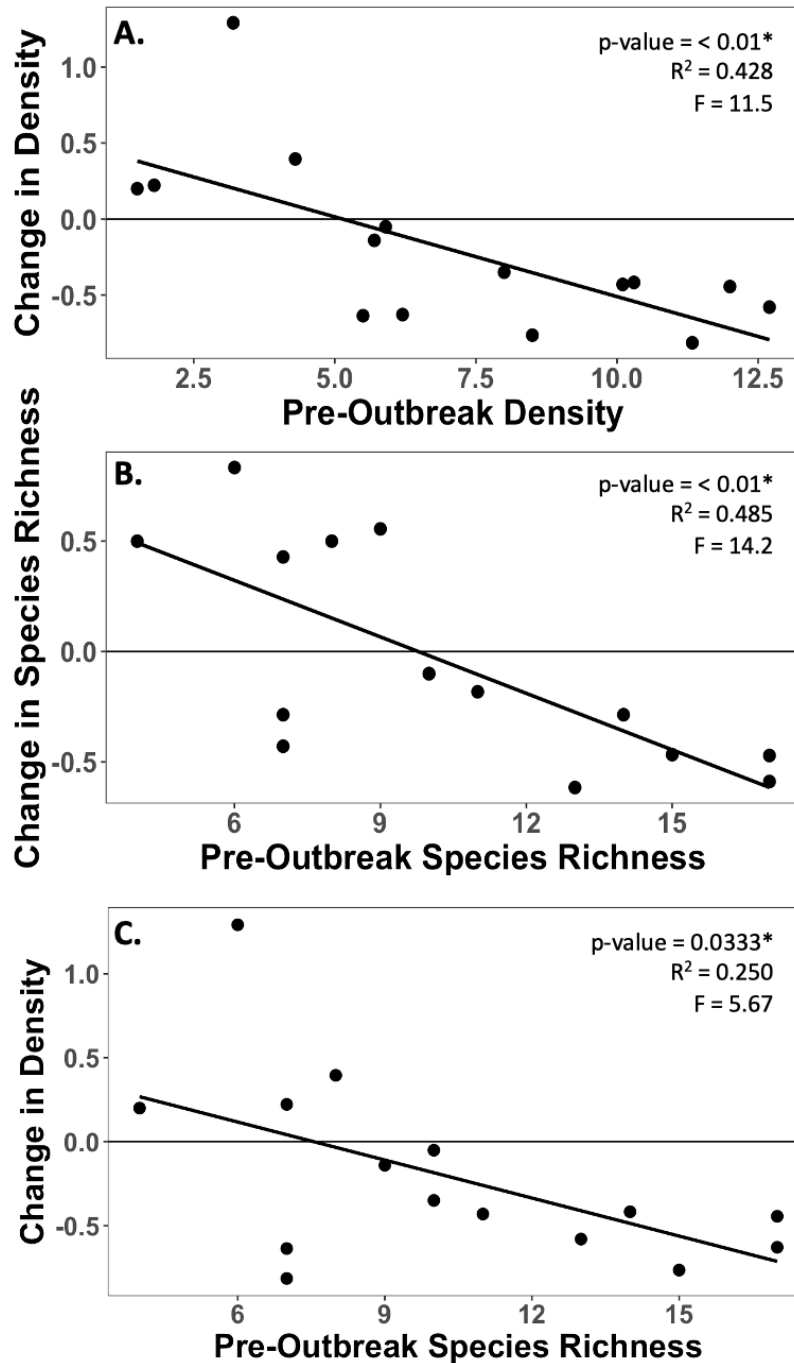

**Supplementary Figure 5. Impacts of disturbances not related to SCTLD. Relationships between pre-outbreak (A) Density (corals/m<sup>2</sup>) and (B) species richness, and its respective proportional change and (C) species richness and proportional change in density in the control and emergent zones.**



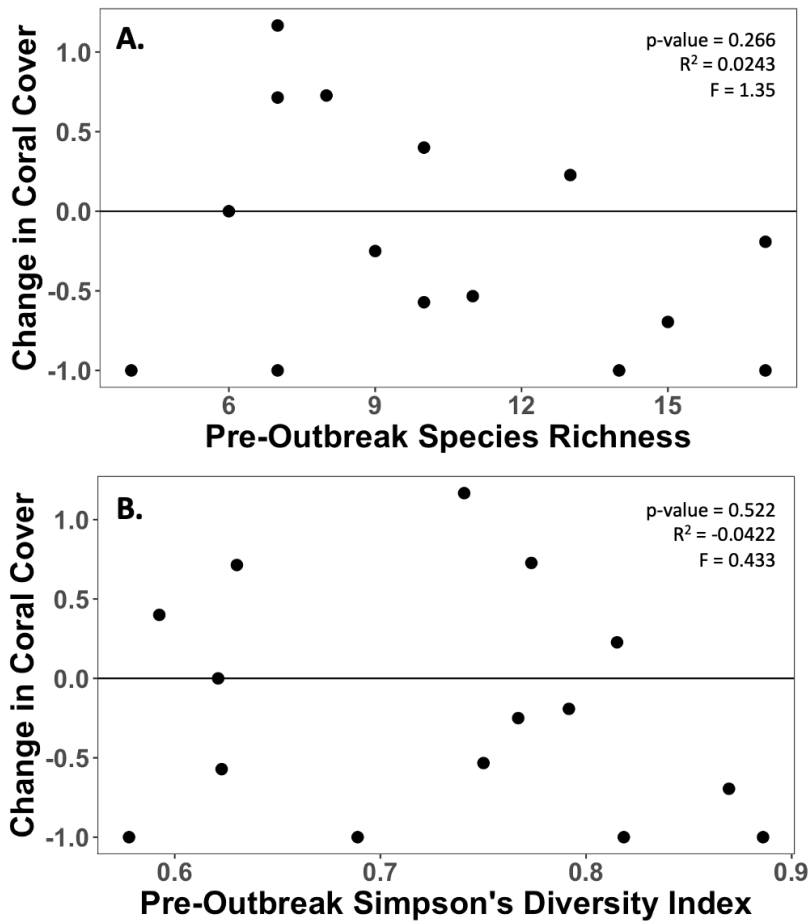

**Supplementary Figure 6. Relationships between the proportional change in coral cover and pre-outbreak (A) species richness (B) and Simpson's Diversity Index in the control and emergent zones.**

**Supplementary Table 3. Maximum Degree Heating Weeks (DHW).** Maximum DHW for each year recorded by NOAA Coral Reef Watch (2020) for St. Thomas, USVI.

| Year | Max DHW |
|------|---------|
| 2017 | 1.094   |
| 2018 | 0       |
| 2019 | 8.888   |
| 2020 | 3.261   |
